# Supplementary material
Source: publisher site journal article supplement (http://e-cmh.org/upload/media/cmh-2023-0328-Supplementary-Table-3.pdf)
Supplement: Supplementary file 1 [file cmh-2023-0328-Supplementary-Table-3.pdf]

**Supplementary Table 3.** Comparison of baseline characteristics between patients with and without the development of major adverse cardiovascular events (MACE)

| Characteristics                      | Without MACE (n=4,082) | With MACE (n=42)    | P-value |
|--------------------------------------|------------------------|---------------------|---------|
| <b>Treatment</b>                     |                        |                     |         |
| TAF, n (%)                           | 933 (22.9)             | 5 (11.9)            | 0.134   |
| TDF, n (%)                           | 3,149 (77.1)           | 37 (88.1)           |         |
| <b>Demographic characteristics</b>   |                        |                     |         |
| Age (yr)                             | 50.5 (41.9–57.7)       | 55.2 (48.9–60.9)    | <0.001  |
| Male, n (%)                          | 2,471 (60.5)           | 30 (71.4)           | 0.137   |
| Height, cm                           | 166.6 (159.7–172.6)    | 166.0 (159.5–170.3) | 0.497   |
| Weight (kg)                          | 66.0 (57.5–74.5)       | 67.4 (62.1–74.0)    | 0.440   |
| Body mass index (kg/m <sup>2</sup> ) | 23.9 (21.9–26.1)       | 24.4 (22.9–26.9)    | 0.215   |
| Systolic BP (mmHg)                   | 122.0 (109.0–134.0)    | 132.0 (119.0–140.0) | 0.018   |
| Diastolic BP (mmHg)                  | 73.0 (65.0–80.0)       | 76.0 (67.0–84.0)    | 0.289   |
| Smoking status, n (%)                |                        |                     | 0.040   |
| Never smoker                         | 1,891 (46.3)           | 20 (47.6)           |         |
| Current smoker                       | 733 (18.0)             | 12 (28.6)           |         |
| Past smoker                          | 605 (14.8)             | 8 (19.0)            |         |
| Not available                        | 853 (20.9)             | 2 (4.8)             |         |
| <b>Comorbidities</b>                 |                        |                     |         |
| Diabetes, n (%)                      | 369 (9.0)              | 13 (31.0)           | <0.001  |
| Hypertension, n (%)                  | 593 (14.5)             | 20 (47.6)           | <0.001  |
| Stroke, n (%)                        | 23 (0.6)               | 1 (2.4)             | 0.602   |
| Myocardial infarction, n (%)         | 8 (0.2)                | 1 (2.4)             | 0.175   |
| Heart failure, n (%)                 | 19 (0.5)               | 0 (0.0)             | 0.999   |
| Coronary artery disease, n (%)       | 40 (1.0)               | 20 (47.6)           | <0.001  |
| Cirrhosis, n (%)                     | 1,656 (40.6)           | 19 (45.2)           | 0.649   |
| Fatty liver, n (%)                   | 631 (15.5)             | 6 (14.3)            | 0.385   |
| HCC, n (%)                           | 276 (6.8)              | 5 (11.9)            | 0.313   |
| <b>Laboratory findings</b>           |                        |                     |         |
| Platelets (×10 <sup>3</sup> /μL)     | 167.0 (120.0–211.0)    | 168.0 (110.5–216.0) | 0.940   |
| AST (IU/L)                           | 56.0 (35.0–93.0)       | 55.0 (37.0–97.5)    | 0.819   |
| ALT (IU/L)                           | 57.0 (30.0–122.0)      | 49.5 (36.0–101.0)   | 0.845   |
| Prothrombin time, INR                | 1.1 (1.0–1.2)          | 1.1 (1.0–1.2)       | 0.201   |
| Albumin (g/dL)                       | 3.9 (3.5–4.1)          | 3.5 (3.0–4.0)       | 0.011   |
| Total bilirubin (mg/dL)              | 0.8 (0.6–1.1)          | 0.8 (0.6–1.3)       | 0.478   |
| Creatinine (mg/dL)                   | 0.8 (0.7–0.9)          | 0.8 (0.7–1.0)       | 0.140   |
| eGFR (mL/min/1.73m <sup>2</sup> )    | 101.0 (93.0–109.5)     | 96.0 (81.0–103.0)   | 0.001   |
| Total cholesterol (mg/dL)            | 169.0 (144.0–194.0)    | 153.0 (124.0–182.0) | 0.009   |
| HDL (mg/dL)                          | 51.0 (41.0–61.0)       | 41.0 (34.0–51.0)    | 0.007   |
| LDL (mg/dL)                          | 108.0 (84.0–132.0)     | 96.0 (75.0–109.0)   | 0.073   |
| Triglyceride (mg/dL)                 | 87.0 (68.0–116.5)      | 100.0 (71.0–181.0)  | 0.041   |
| HBeAg-positive, n (%)                | 1,729 (47.5)           | 13 (36.1)           | 0.232   |

**Supplementary Table 3.** Continued

| Characteristics                   | Without MACE (n=4,082) | With MACE (n=42) | P-value |
|-----------------------------------|------------------------|------------------|---------|
| HBV DNA (log <sub>10</sub> IU/mL) | 5.5 (3.3–7.1)          | 4.8 (3.2–6.1)    | 0.167   |
| Medication use at baseline        |                        |                  |         |
| Aspirin, n (%)                    | 97 (2.4)               | 11 (26.2)        | <0.001  |
| Clopidogrel, n (%)                | 46 (1.1)               | 7 (16.7)         | <0.001  |
| Lipid-lowering agent, n (%)       | 318 (7.8)              | 11 (26.2)        | <0.001  |

Data are presented as a frequency and proportion or as a mean value with interquartile range.

TAF, tenofovir alafenamide; TDF, tenofovir disoproxil fumarate; BP, blood pressure; ALT, alanine aminotransferase; AST, aspartate aminotransferase; INR, international normalized ratio; eGFR, estimated glomerular filtration rate; HDL, high-density lipoprotein; LDL, low-density lipoprotein; HBeAg, hepatitis B e antigen; HBV, hepatitis B virus.
